# Supplementary material
Source: Research Square preprint supplement (doi:10.21203/rs.3.rs-9195111/v1)
Supplement: Supplementary file 2 [file e7a09dea849afd77eca061f8.docx]

**Supplementary Tables**

**Table S1** Early recovery slope by spectral index. Summary statistics of early post-disturbance recovery slope for each index; *N* = number of valid cases, *IQR* = interquartile range, *SD* = standard deviation

| **Index** | **N** | **Median** | **IQR** | **Mean** | **SD** |
| --- | --- | --- | --- | --- | --- |
| NDVI | 75 | 0.066518 | 0.222038 | 0.091358 | 0.274938 |
| EVI | 75 | 0.063581 | 0.220719 | 0.057174 | 0.204988 |
| NDMI | 75 | 0.053631 | 0.348783 | 0.054508 | 0.234432 |
| NBR | 75 | 0.068935 | 0.34467 | 0.083649 | 0.243073 |

**Table S2** Post-hoc pairwise tests for disturbance magnitude. Pairwise comparisons of disturbance magnitude among indices; *p_raw* = unadjusted p-value, *p_Holm* = Holm-adjusted p-value for multiple testing

| **Comparison** | **p_raw** | **p_Holm** |
| --- | --- | --- |
| NDVI vs NDMI | 1.76E-05 | 0.000106 |
| NDMI vs NBR | 0.00019 | 0.000948 |
| NDVI vs NBR | 0.004761 | 0.019045 |
| NDVI vs EVI | 0.005622 | 0.019045 |
| EVI vs NDMI | 0.152713 | 0.305425 |
| EVI vs NBR | 0.402853 | 0.402853 |

**Table S3** Patch-level success rates across indices by window. Proportion of observable patches with ≥1, ≥2, ≥3, or ≥4 indices detecting a breakpoint; *n_patches_observable* = patches with valid window data, *n_patches_ok_geK* = patches with ≥K indices “ok”, and *rate_ok_geK* = corresponding proportion

| **window** | **n_patches_observable** | **n_patches_ok_ge1** | **n_patches_ok_ge2** | **n_patches_ok_ge3** | **n_patches_ok_ge4** | **rate_ok_ge1** | **rate_ok_ge2** | **rate_ok_ge3** | **rate_ok_ge4** |
| --- | --- | --- | --- | --- | --- | --- | --- | --- | --- |
| W7_5_9 | 66 | 34 | 32 | 27 | 18 | 0.515152 | 0.484848 | 0.409091 | 0.272727 |
| W14_12_16 | 80 | 43 | 40 | 32 | 19 | 0.5375 | 0.5 | 0.4 | 0.2375 |
| W21_19_23 | 155 | 73 | 68 | 58 | 39 | 0.470968 | 0.43871 | 0.374194 | 0.251613 |
| W25_23_27 | 125 | 106 | 101 | 97 | 88 | 0.848 | 0.808 | 0.776 | 0.704 |

**Table S4** Breakpoint sign and magnitude in the final-harvest window (23–27 years).*n_negative*/*n_positive* = counts of negative/positive break magnitudes among detected cases, *neg_pct* = % negative, *median_magnitude* = median signed magnitude, *median_abs_magnitude* = median |magnitude|, *median_break_date* = median breakpoint timing (date)

| **index** | **n_ok** | **n_negative** | **n_positive** | **neg_pct** | **median_magnitude** | **median_abs_magnitude** | **median_break_date** |
| --- | --- | --- | --- | --- | --- | --- | --- |
| EVI | 99 | 61 | 38 | 61.61616 | -0.03445 | 0.067445 | 2/15/2022 |
| NBR | 97 | 61 | 36 | 62.8866 | -0.03804 | 0.079195 | 3/15/2022 |
| NDMI | 99 | 64 | 35 | 64.64646 | -0.02889 | 0.062464 | 2/15/2022 |
| NDVI | 97 | 64 | 33 | 65.97938 | -0.04588 | 0.065595 | 11/15/2021 |

**Table S5** Patch–outside contrast in CCDC change coverage. Comparison of change fractions inside patches vs outside reference rings; *mean_fraction_patch*/*buffer* and *median_fraction_patch*/*buffer* summarize changed-pixel fractions, *mean_diff_patch_minus_buffer* = mean (patch − buffer), *prop_patch_gt_buffer* = proportion of cases where patch change fraction exceeds buffer

| **District** | **N** | **mean_fraction_patch** | **mean_fraction_buffer** | **median_fraction_patch** | **median_fraction_buffer** | **mean_diff_patch_minus_buffer** | **prop_patch_gt_buffer** |
| --- | --- | --- | --- | --- | --- | --- | --- |
| anuradhapura | 126 | 0.068 | 0.058 | 0.008 | 0.031 | 0.010 | 0.325 |
| moneragala | 25 | 0.076 | 0.044 | 0.018 | 0.029 | 0.032 | 0.320 |
| polonnaruwa | 40 | 0.094 | 0.047 | 0.005 | 0.016 | 0.047 | 0.400 |
| puttlam | 15 | 0.175 | 0.194 | 0.106 | 0.182 | -0.019 | 0.467 |
| trincomalee | 21 | 0.057 | 0.039 | 0.017 | 0.032 | 0.018 | 0.333 |

**Table S6** CCDC–BFAST timing consistency. Agreement between BFAST final-window break dates (“ok”) and CCDC median pixel break dates; counts show *both*, *BFAST only*, *CCDC only*, *neither*; *median_abs_diff_days* = median absolute timing difference, and “% within ±1 year / ±2 years” report alignment rates. *BFAST reference* indicates how the BFAST date was defined (e.g., per-index or pooled “ANY” across indices)

| **BFAST reference** | **both (BFAST & CCDC)** | **BFAST only** | **CCDC only** | **neither** | **median_abs_diff_days** | **% within ±1 year** | **% within ±2 years** |
| --- | --- | --- | --- | --- | --- | --- | --- |
| ANY | 79 | 27 | 76 | 45 | 1147 | 17.7 | 41.8 |
| NBR | 74 | 23 | 81 | 49 | 1062 | 23.0 | 41.9 |
| NDVI | 72 | 25 | 83 | 47 | 1137 | 22.2 | 34.7 |
| NDMI | 75 | 24 | 80 | 48 | 1077 | 22.7 | 40.0 |

Note: Median absolute timing differences exceeding 1000 days indicate substantial disagreement in exact change timing between the patch-aggregated BFAST and pixelwise CCDC summaries, even where broader ±2-year alignment is observed.

**Table S7** District rainfall anomaly characteristics (2017–2026). Monthly precipitation and anomaly statistics by district using patch centroids; *Mean/Median monthly P (mm)* = CHIRPS precipitation, *Mean |z|* = mean absolute standardized anomaly, and threshold columns report the % of months with |z| ≥ 1, 1.5, and 2

| **District** | **Patches (n)** | **Mean monthly P (mm)** | **Median monthly P (mm)** | **Mean |z|** | **% months |z|≥1** | **% months |z|≥1.5** | **% months |z|≥2** |
| --- | --- | --- | --- | --- | --- | --- | --- |
| Anuradhapura | 126 | 118.77 | 72.97 | 1.11 | 41.61 | 20.66 | 12.55 |
| Monaragala | 25 | 139.88 | 101.38 | 1.07 | 39.97 | 25.97 | 16.20 |
| Polonnaruwa | 40 | 149.17 | 105.74 | 1.13 | 42.75 | 22.65 | 13.38 |
| Puttalam | 15 | 112.84 | 62.92 | 1.11 | 42.28 | 24.83 | 12.28 |
| Trincomalee | 21 | 125.80 | 70.77 | 1.07 | 41.83 | 19.84 | 10.79 |

**Table S8** Top management-strict patch candidates per district. Patch shortlist meeting strict criteria; *Establish* = establishment year, *Break month (BFAST)* = detected breakpoint month, *Ok indices* = indices with successful detection, *Median |magnitude|* = median absolute breakpoint magnitude across available indices, *z_patch*/*z_outside* = rainfall anomaly z-scores at the patch centroid and outside reference area for the breakpoint month

| **District** | **Patch ID** | **Patch name** | **Establish** | **Break month (BFAST)** | **Ok indices** | **Median |magnitude|** | **z_patch** | **z_outside** |
| --- | --- | --- | --- | --- | --- | --- | --- | --- |
| anuradhapura | 77 | Olukalagala | 1997 | 2021-03 | 4 | 1.0376 | -0.406 | -0.388 |
| anuradhapura | 70 | Mahahalmillewa | 1998 | 2021-08 | 4 | 0.3788 | 0.215 | 0.247 |
| anuradhapura | 122 | Welimuwapothana | 1998 | 2022-01 | 4 | 0.3255 | -0.854 | -0.828 |
| anuradhapura | 112 | Thiththagoneewa | 1998 | 2022-03 | 4 | 0.2824 | 0.443 | 0.432 |
| anuradhapura | 22 | Kawarakkulama1 | 1998 | 2021-07 | 4 | 0.2777 | 0.114 | 0.435 |
| moneragala | 148 | Undugodayaaya_farmer_woodlot | 1996 | 2019-04 | 4 | 0.1431 | 0.254 | 0.257 |
| moneragala | 149 | Usgala | 1997 | 2021-01 | 4 | 0.1395 | 0.910 | 0.866 |
| moneragala | 131 | Dikkendagoda | 1998 | 2021-06 | 4 | 0.0960 | 0.510 | 0.709 |
| moneragala | 132 | Hambegamuwa | 1999 | 2022-06 | 4 | 0.0947 | -0.809 | -0.633 |
| polonnaruwa | 176 | Palliyagodella | 1998 | 2021-04 | 4 | 0.3281 | 0.354 | 0.391 |
| polonnaruwa | 158 | Darshanapura2 | 1998 | 2023-12 | 3 | 0.1957 | 0.198 | 0.216 |
| polonnaruwa | 166 | Kumudupura_Jayagampura | 1999 | 2023-06 | 4 | 0.1426 | -0.197 | -0.430 |
| polonnaruwa | 157 | Darshanapura1 | 1997 | 2020-02 | 4 | 0.1240 | -0.665 | -0.637 |
| polonnaruwa | 167 | Mahaulpotha | 1998 | 2023-01 | 4 | 0.1008 | 0.275 | 0.220 |
| puttlam | 197 | Mahahenegama | 1999 | 2023-04 | 4 | 0.0606 | -0.087 | -0.070 |
| puttlam | 201 | Neelabemma | 1999 | 2023-03 | 4 | 0.0541 | -0.347 | -0.355 |
